# Supplementary material for: 1,1′-Bi-2-naphthol-fluoroacetyl compounds in fluorescent recognition of amines
Source: Royal Society of Chemistry journal article supplement (doi:10.1039/c3qo00076a), 2014-01-01

## Supporting Information for

# 1,1'-Bi-2-naphthol-Fluoroacetyl Compounds in Fluorescent Recognition of Amines

Shanshan Yu, Winston Plunkett, Michael Kim, Elaine Wu and Lin Pu\*

### NMR Spectra of Compounds

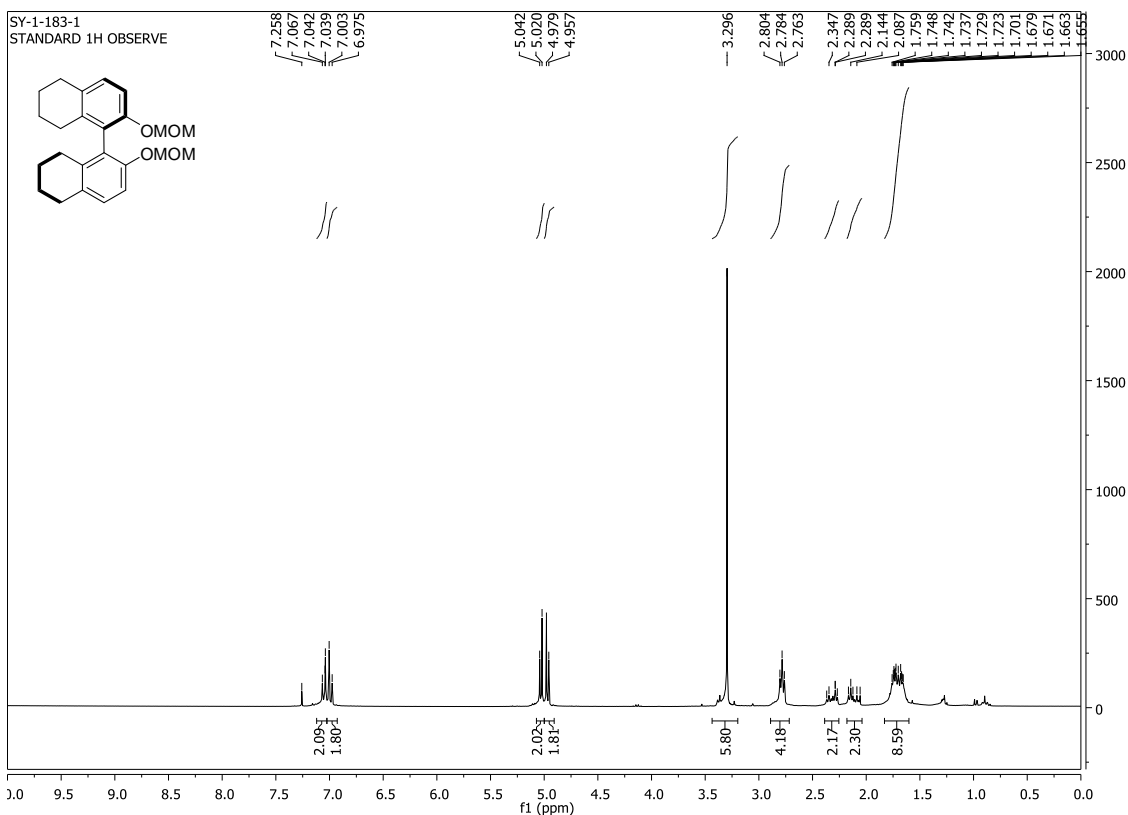

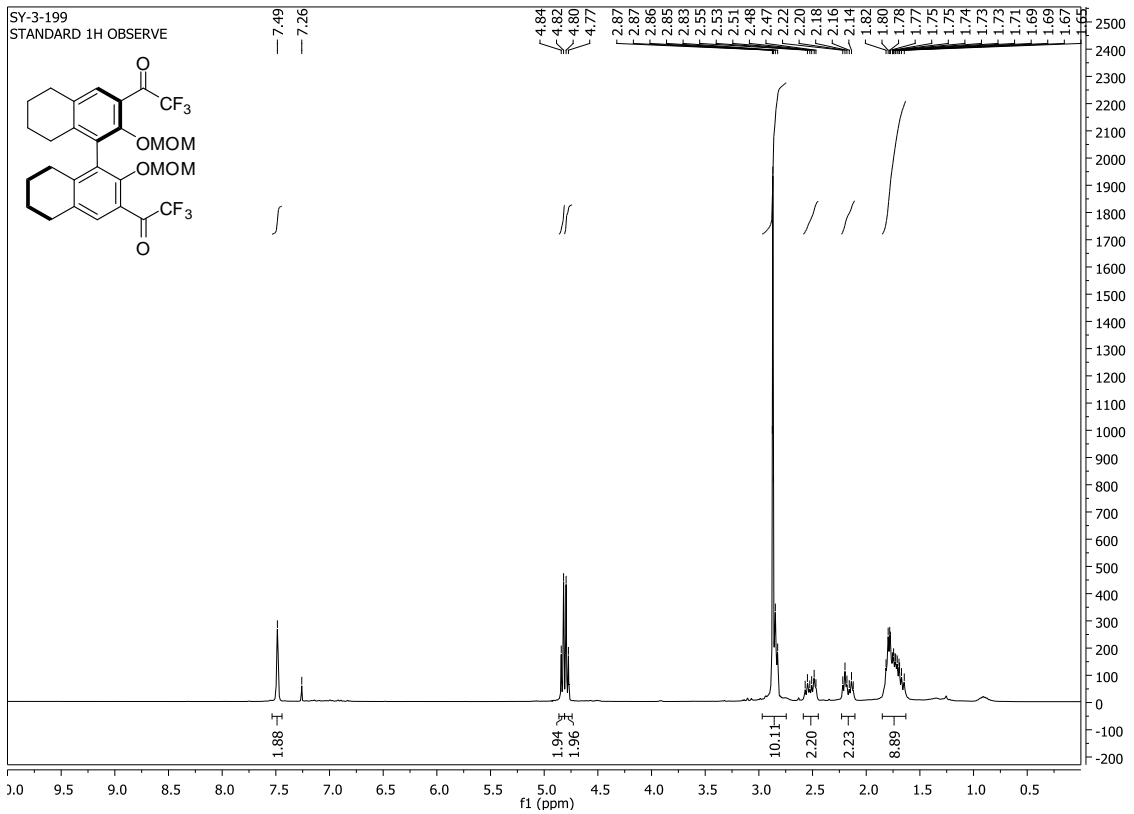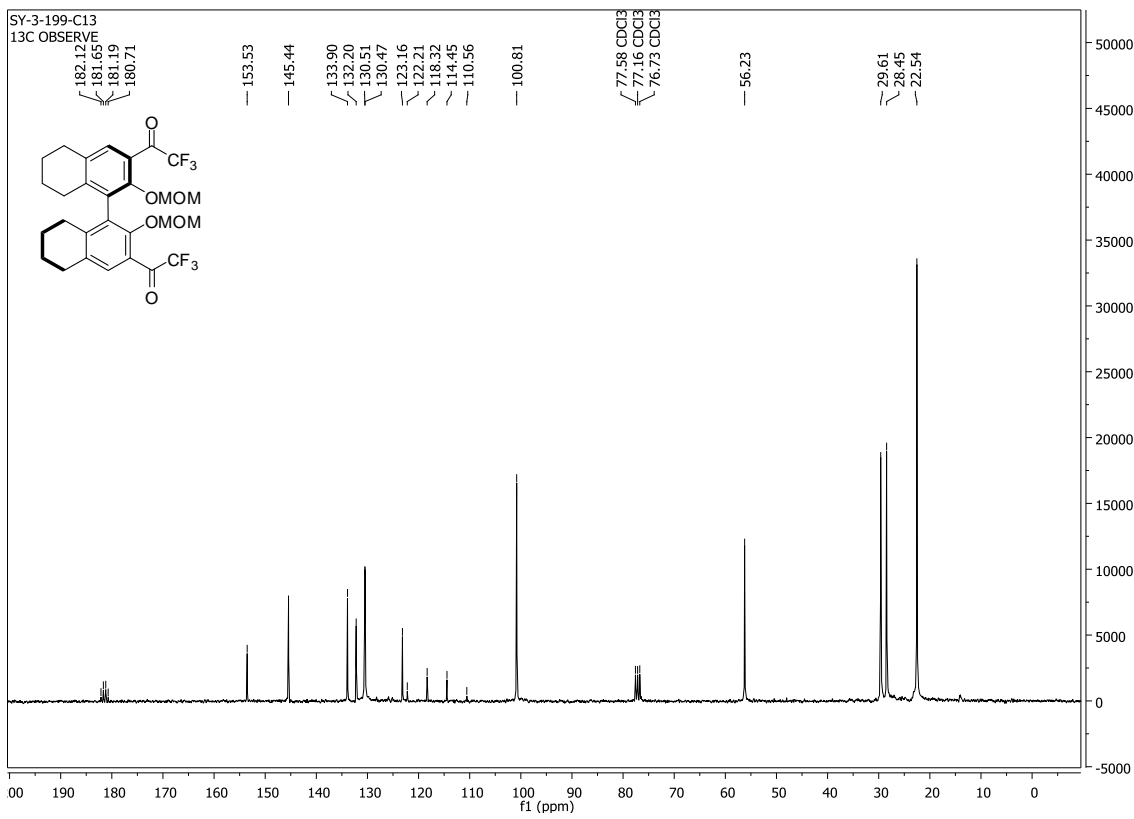

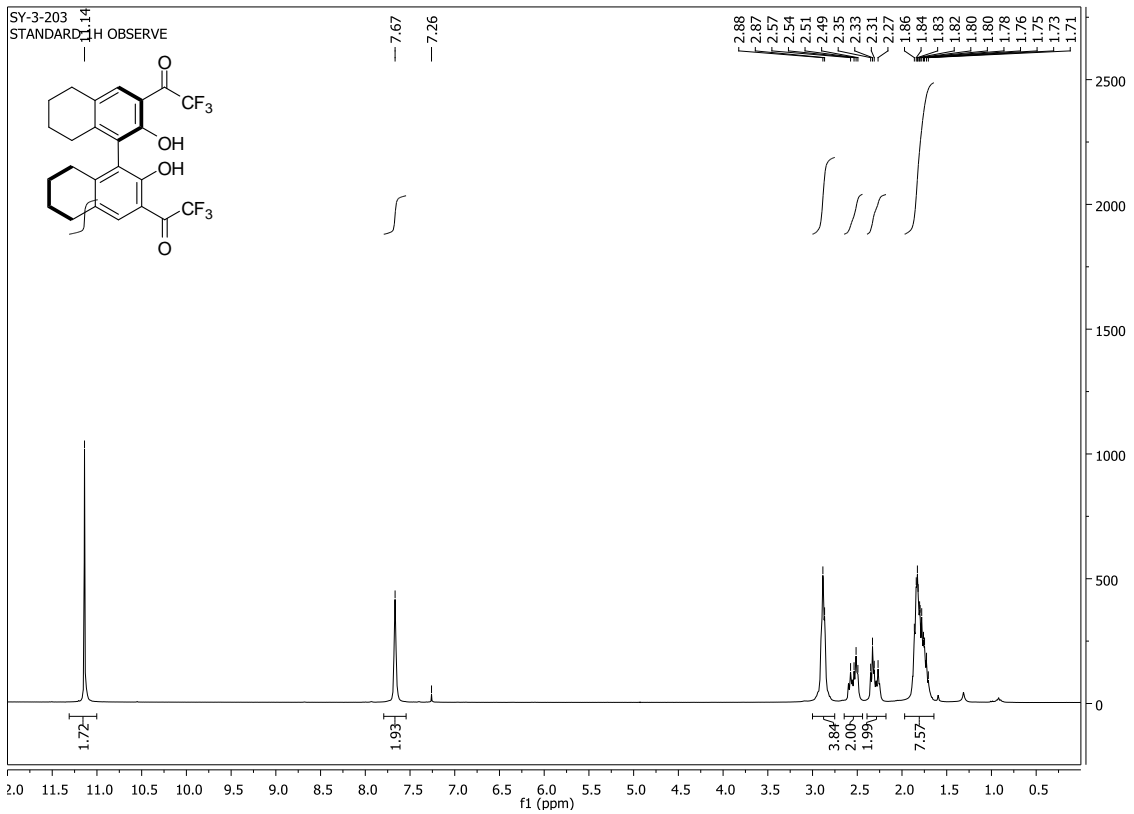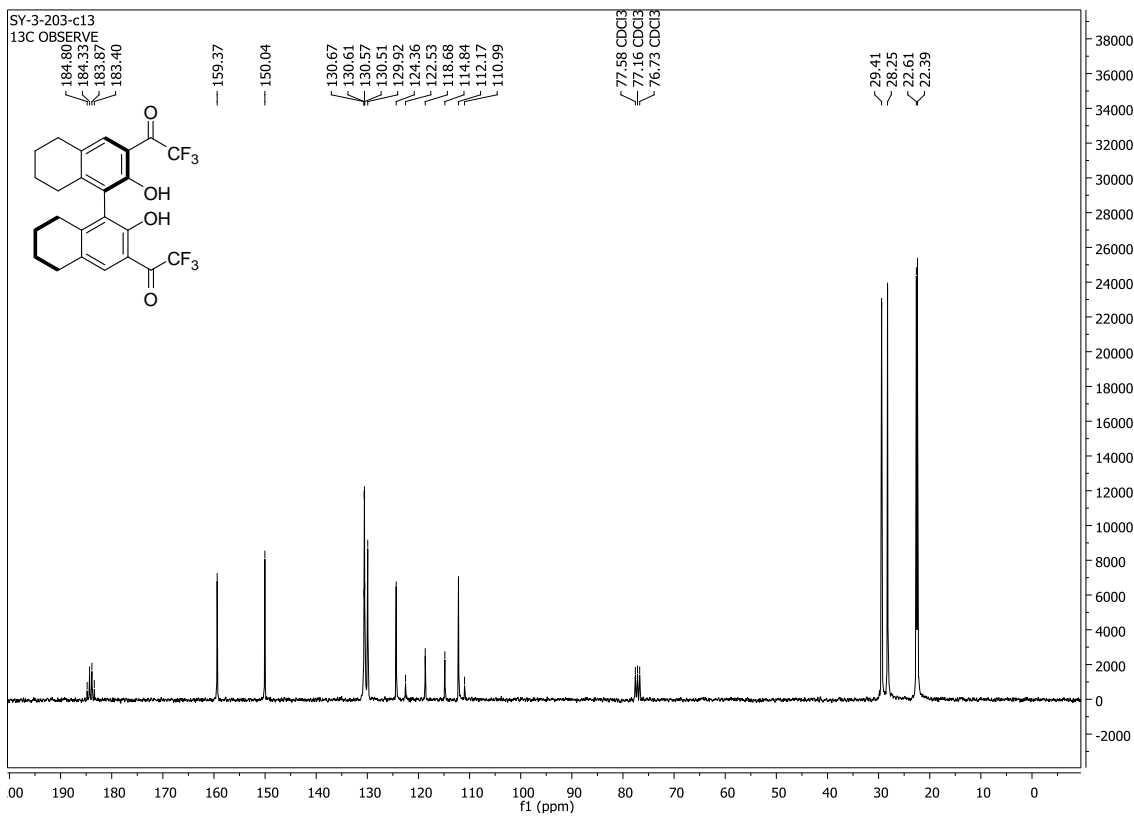

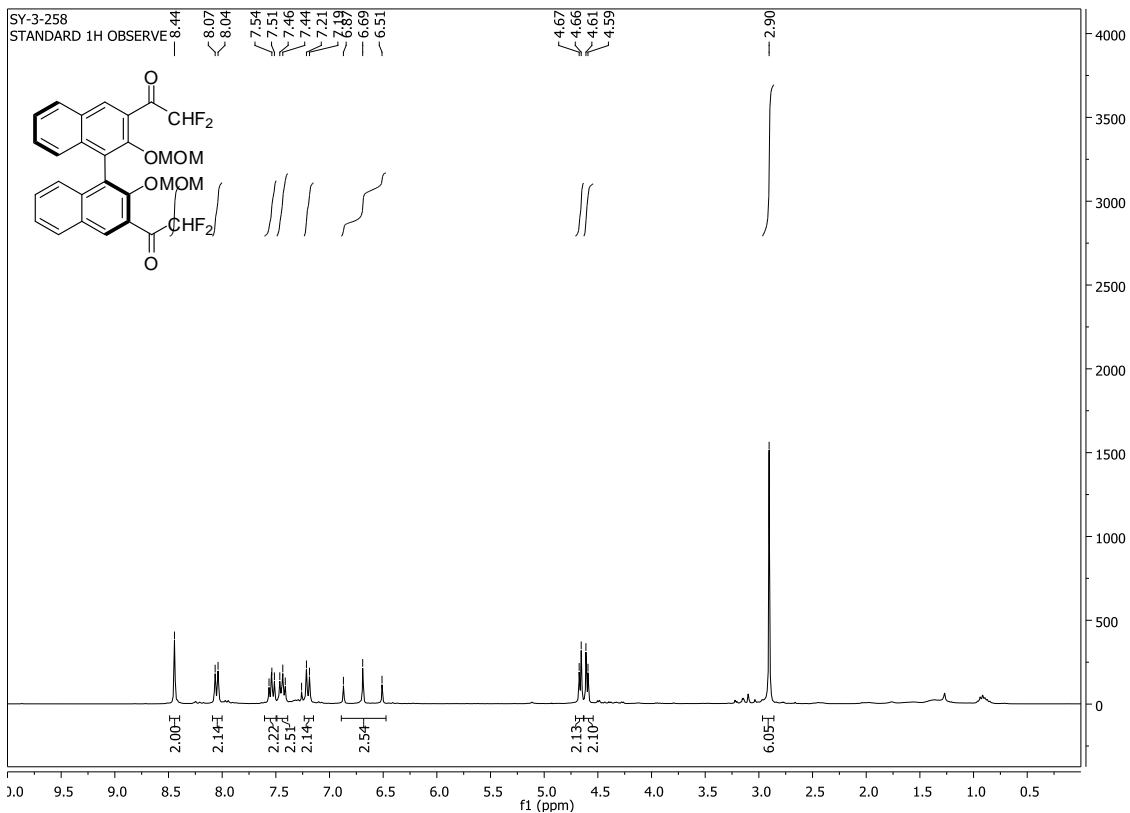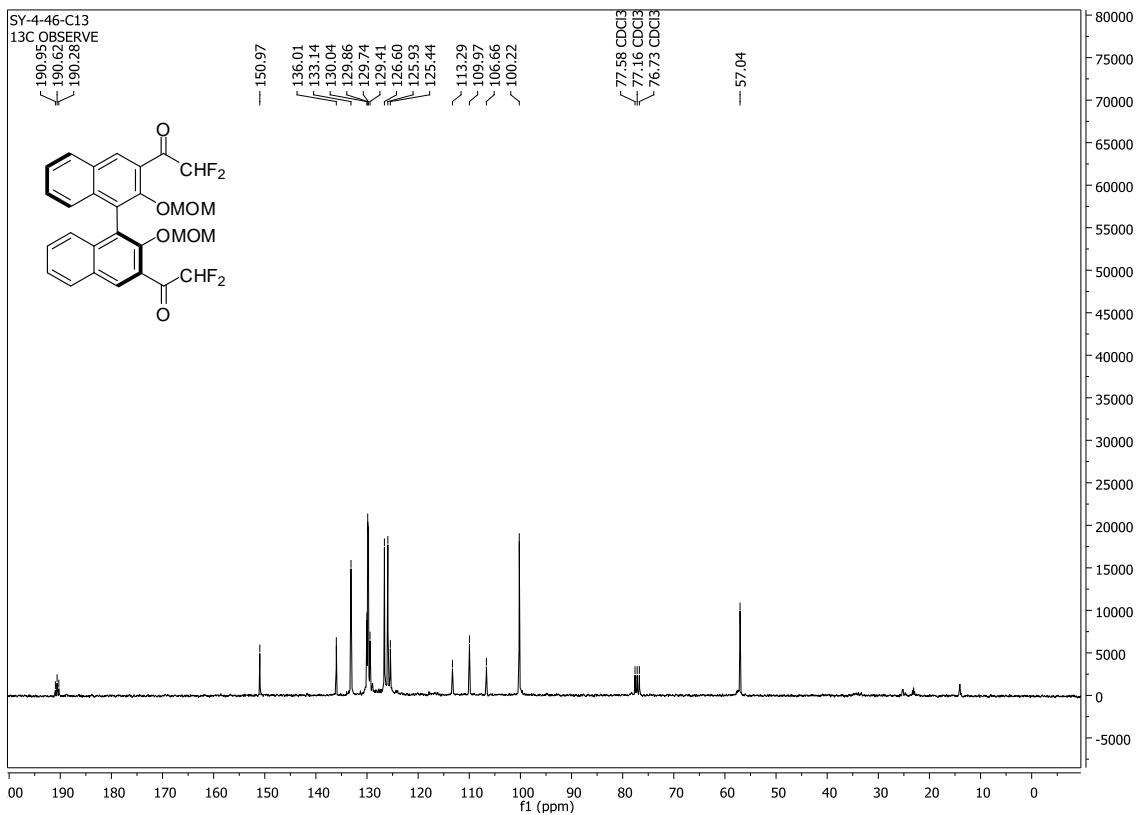

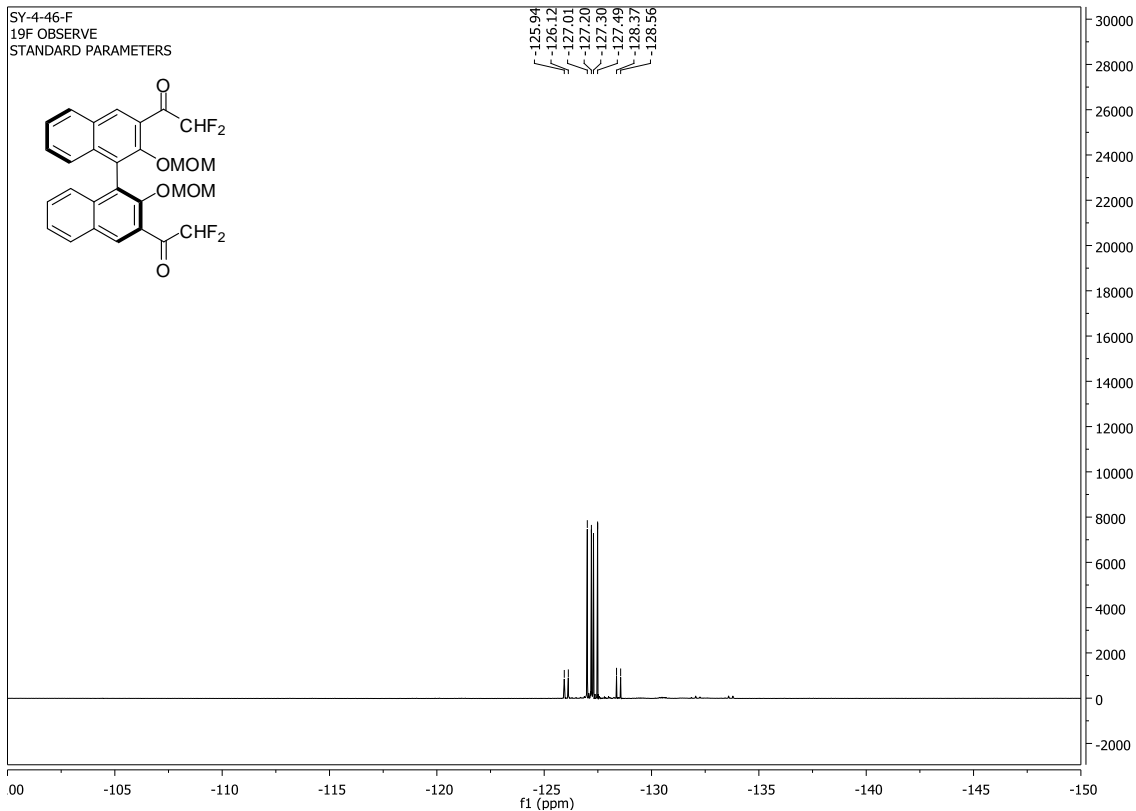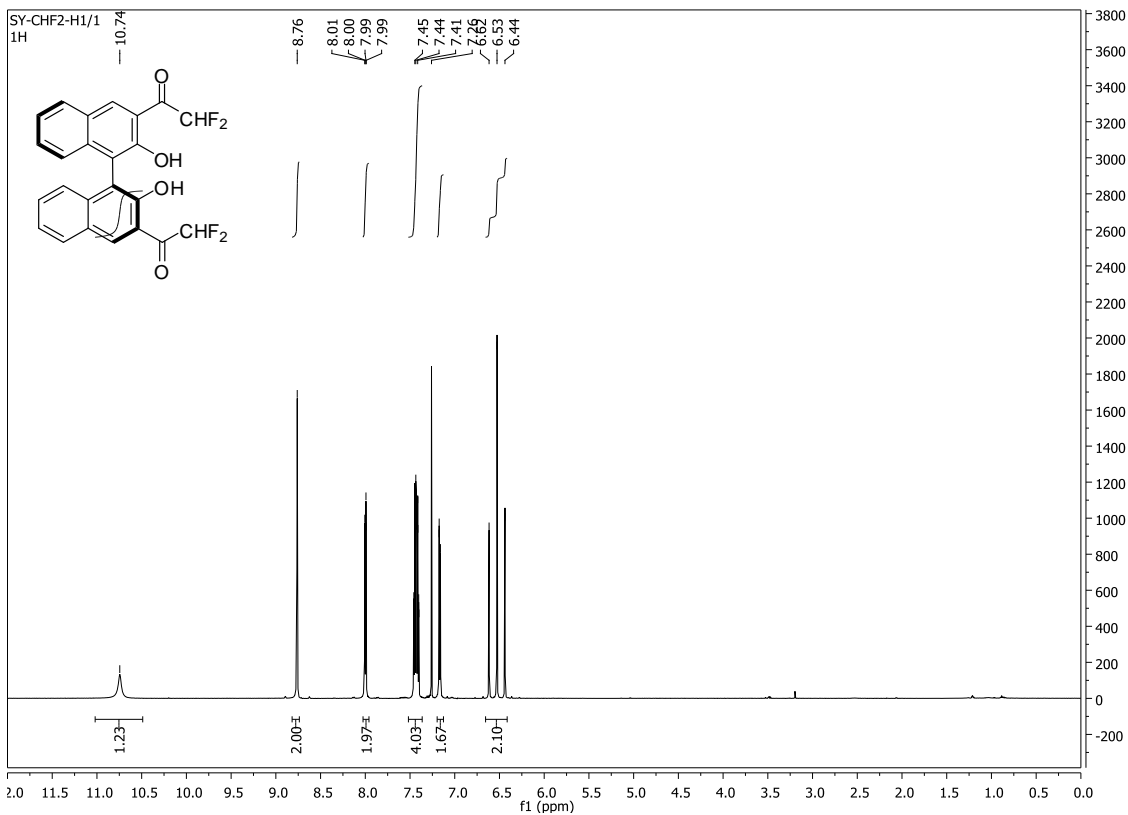

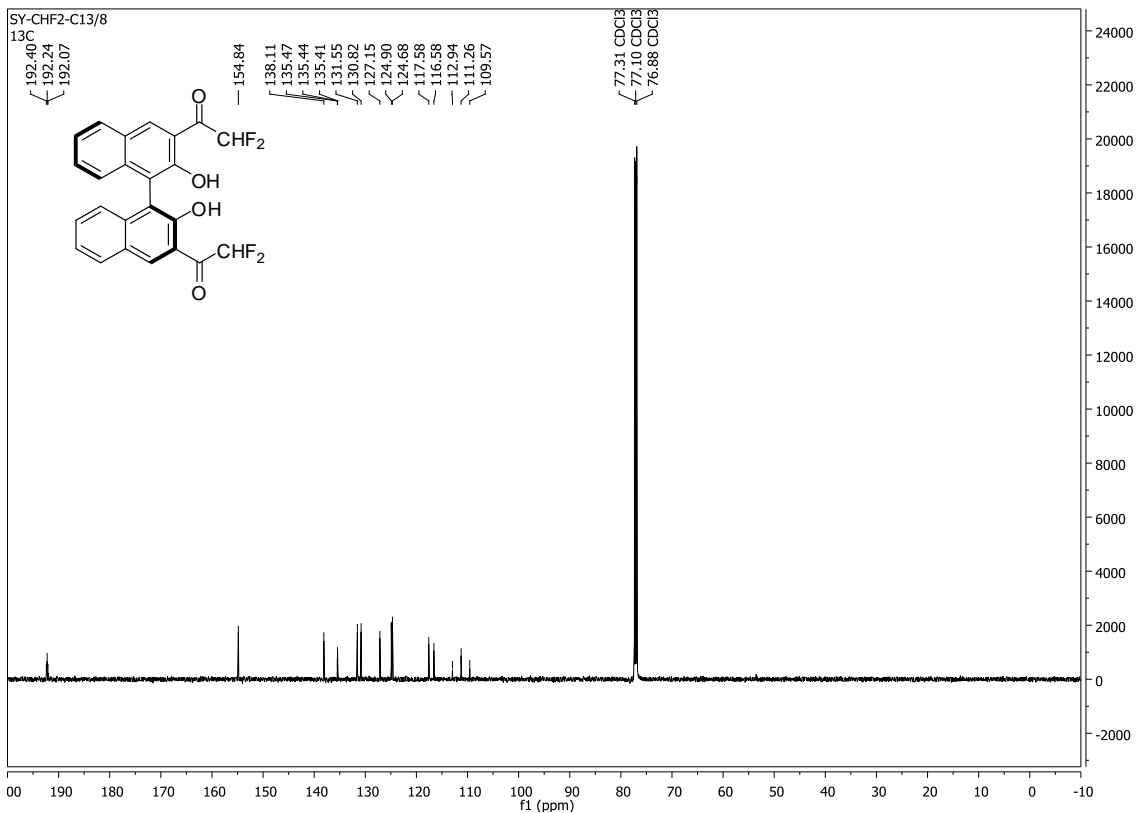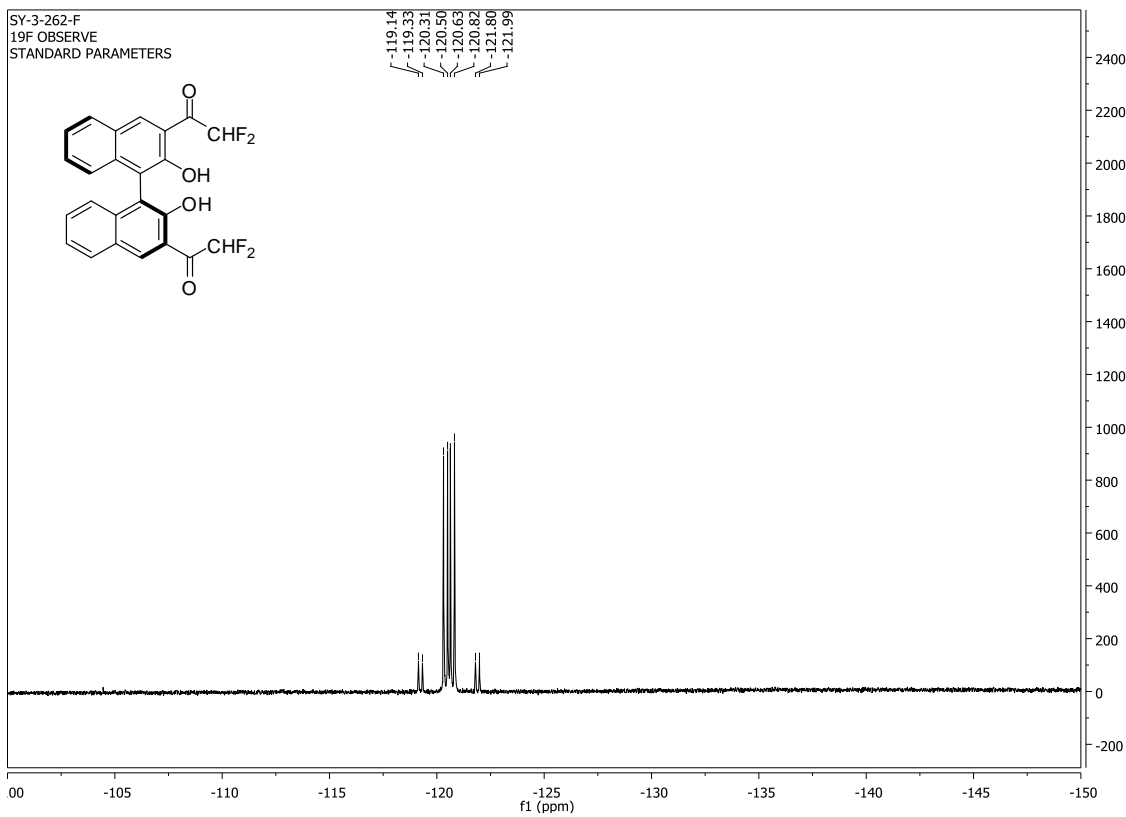

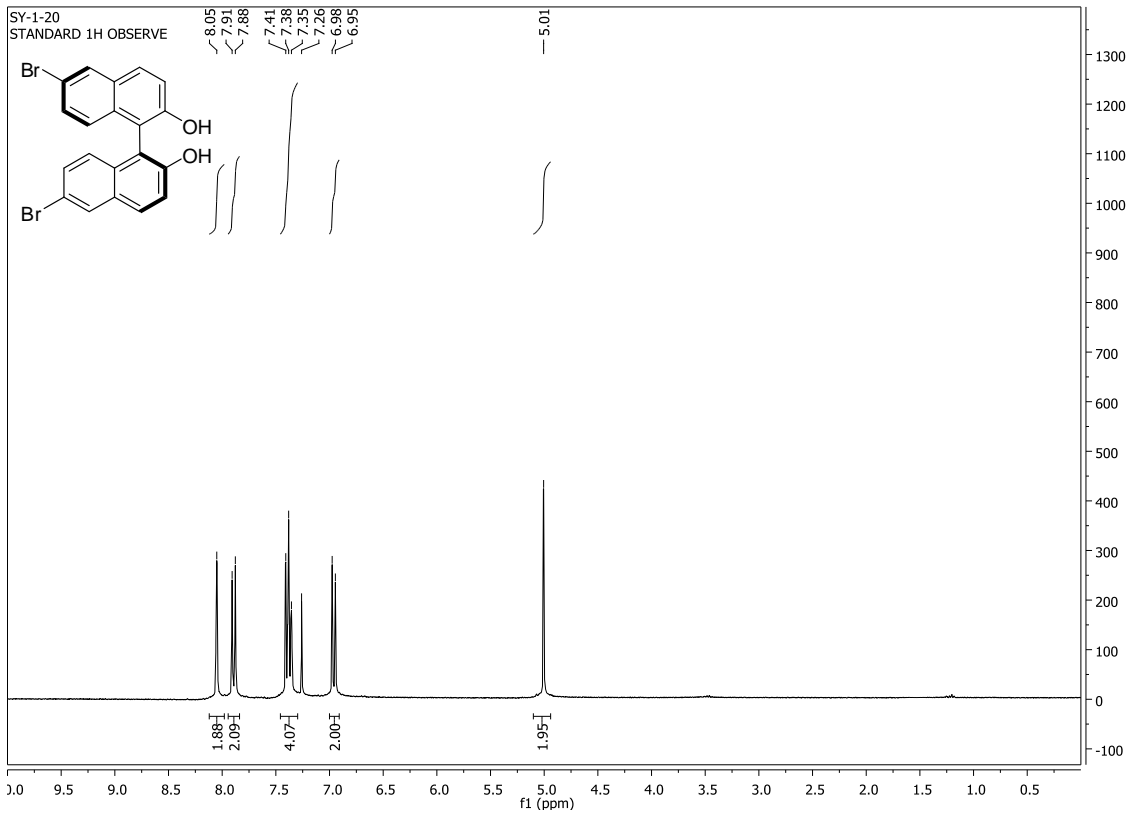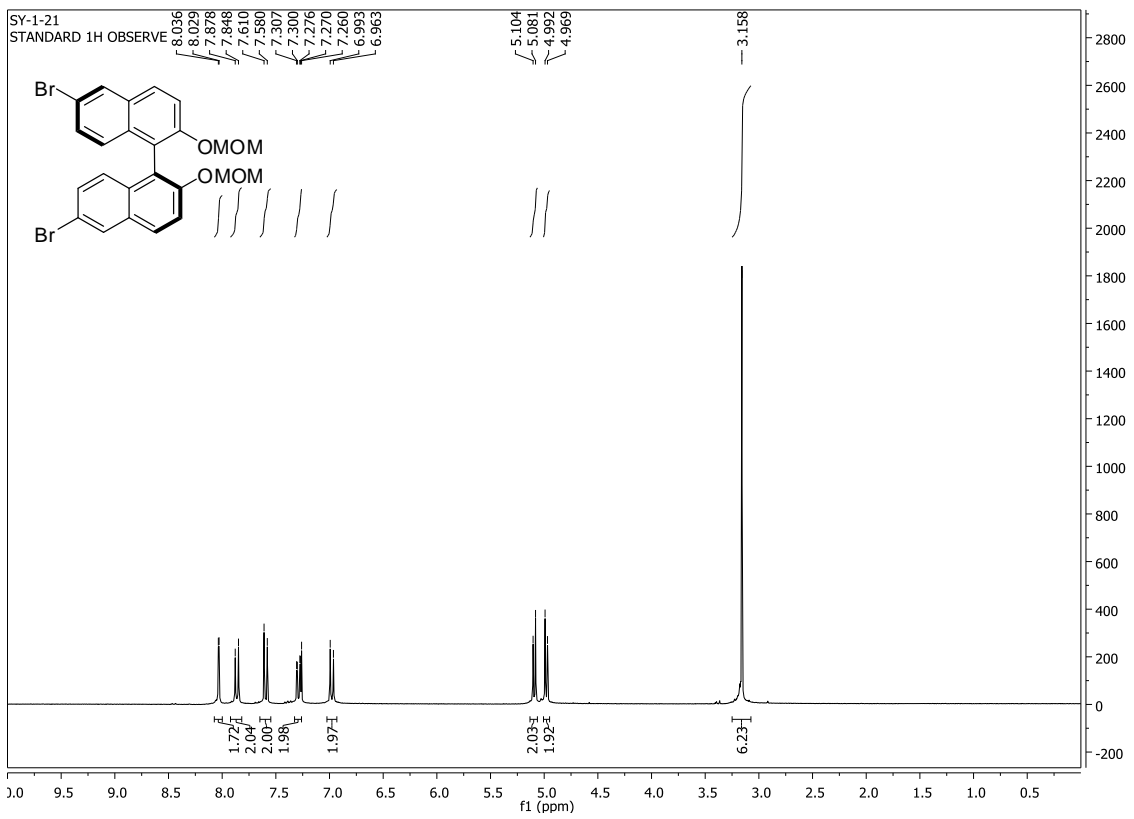

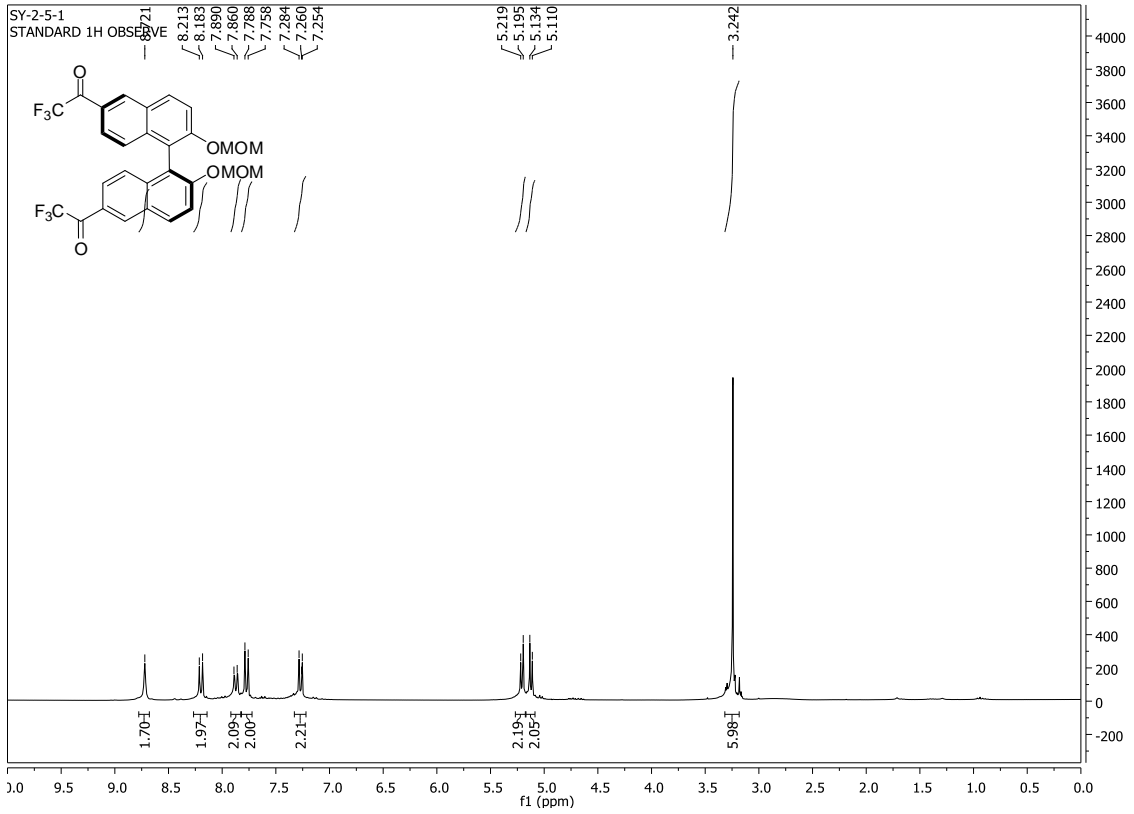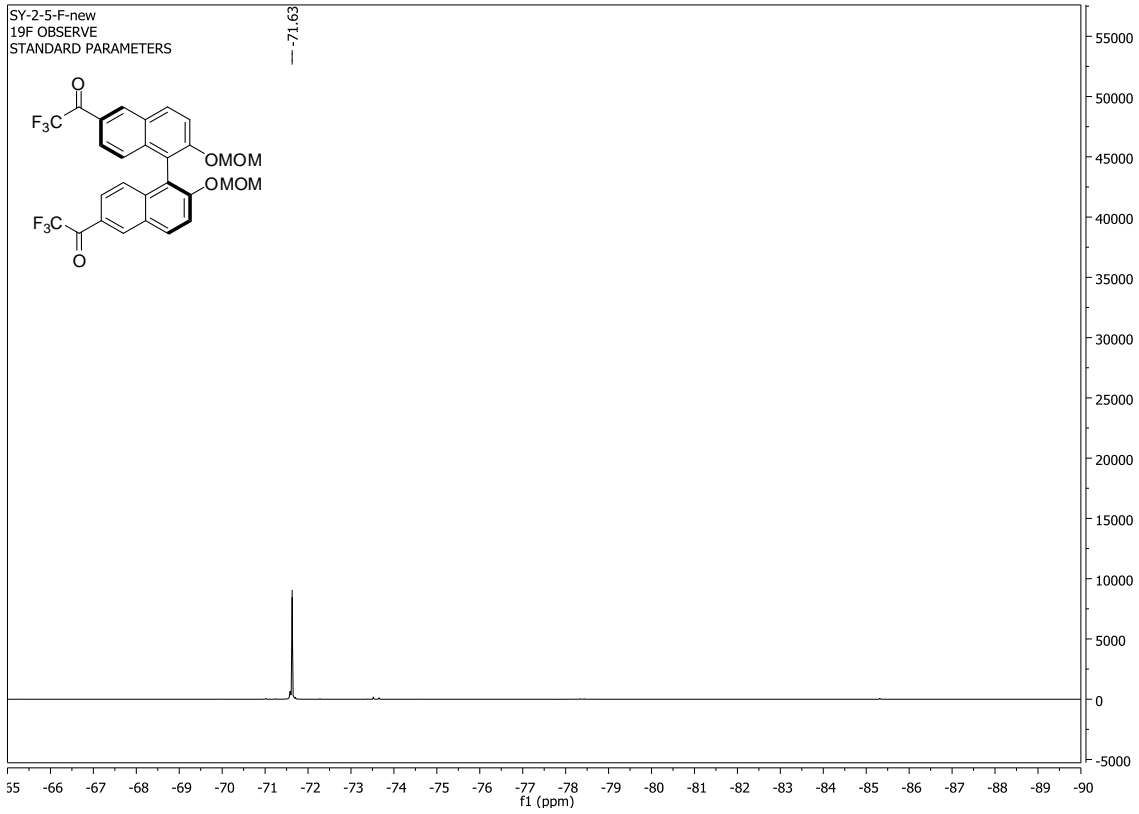



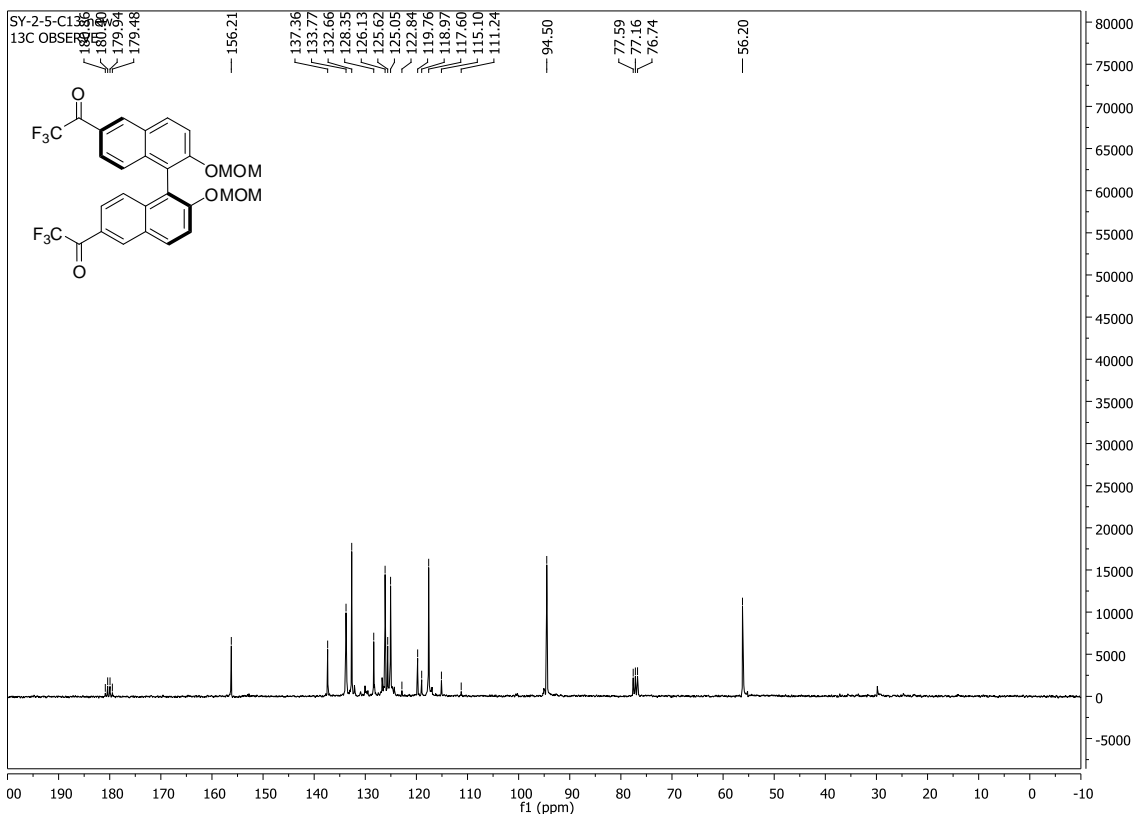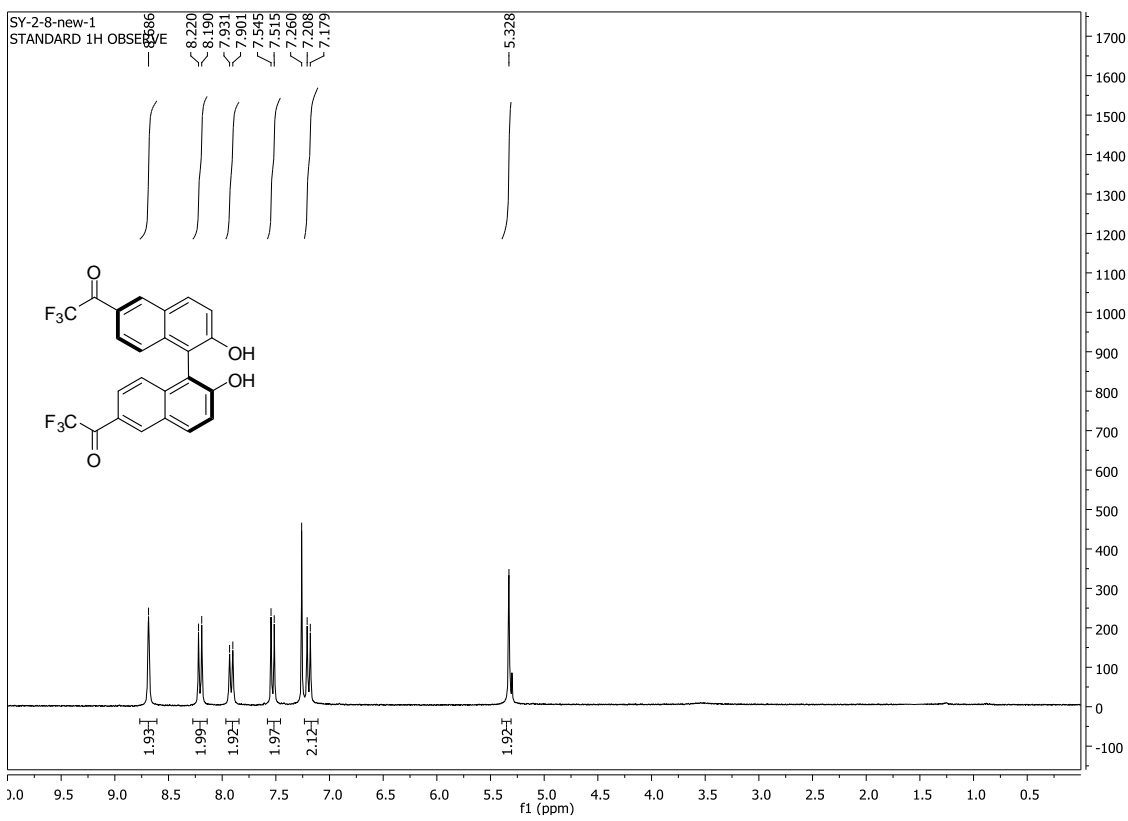

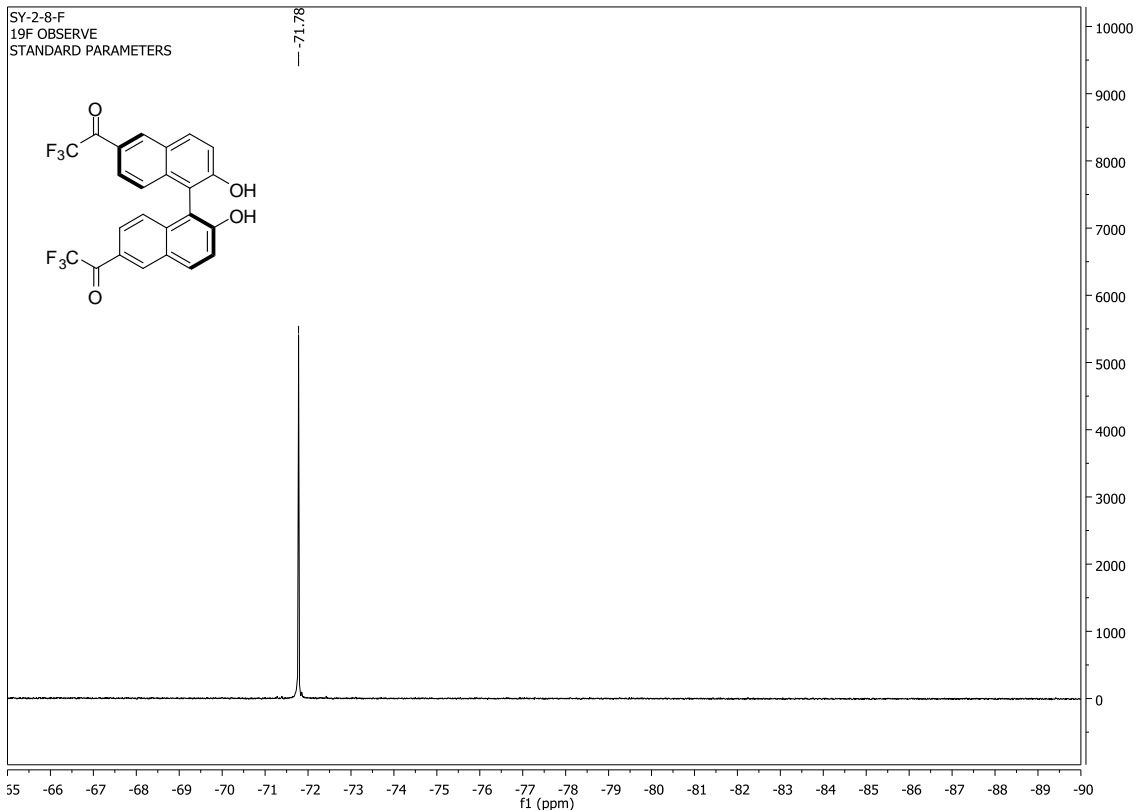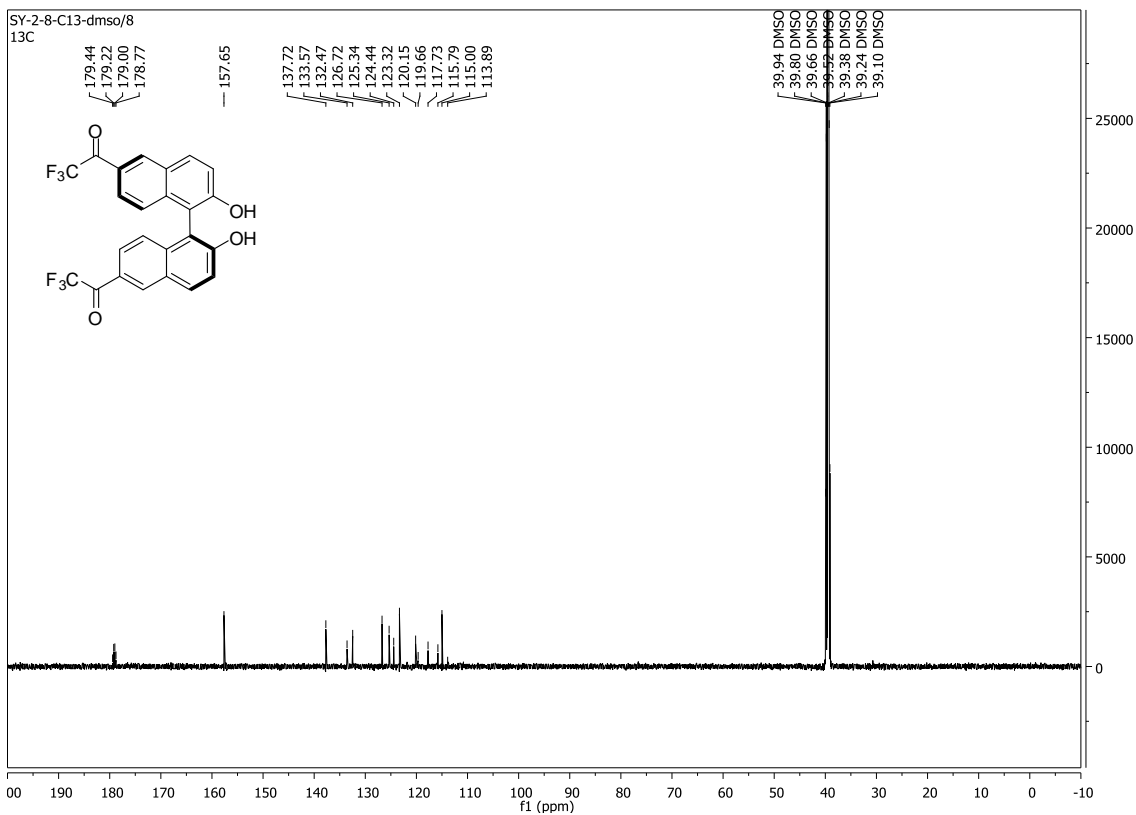

Supplement: c3qo00076a1.pdf [file c3qo00076a1.pdf]
